# Supplementary material
Source: PubMed Central journal article supplement (PMC5269510)
Supplement: NIHMS827567-supplement-Graphic_Abstract.pdf [file NIHMS827567-supplement-Graphic_Abstract.pdf]

Innate Pattern Recognition Receptor Signaling  
And High Lipid and Cholesterol Exposure

↓  
Inflammatory Signaling Activation

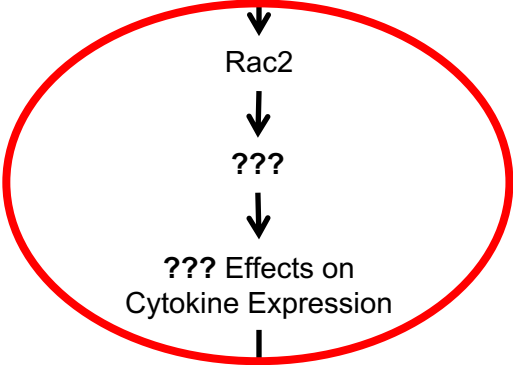

Macrophage

↓  
Osteogenesis Genetic Program

↓  
Atherosclerotic Calcification

Vascular  
Mesenchymal Cell
